# Supplementary material
Source: HighWire-hosted journal article supplement (https://jnm.snmjournals.org/highwire/filestream/95266/field_highwire_adjunct_files/0/192393_Supplemental_Data.pdf)
Supplement: 192393_Supplemental_Data.pdf [file 192393_Supplemental_Data.pdf]

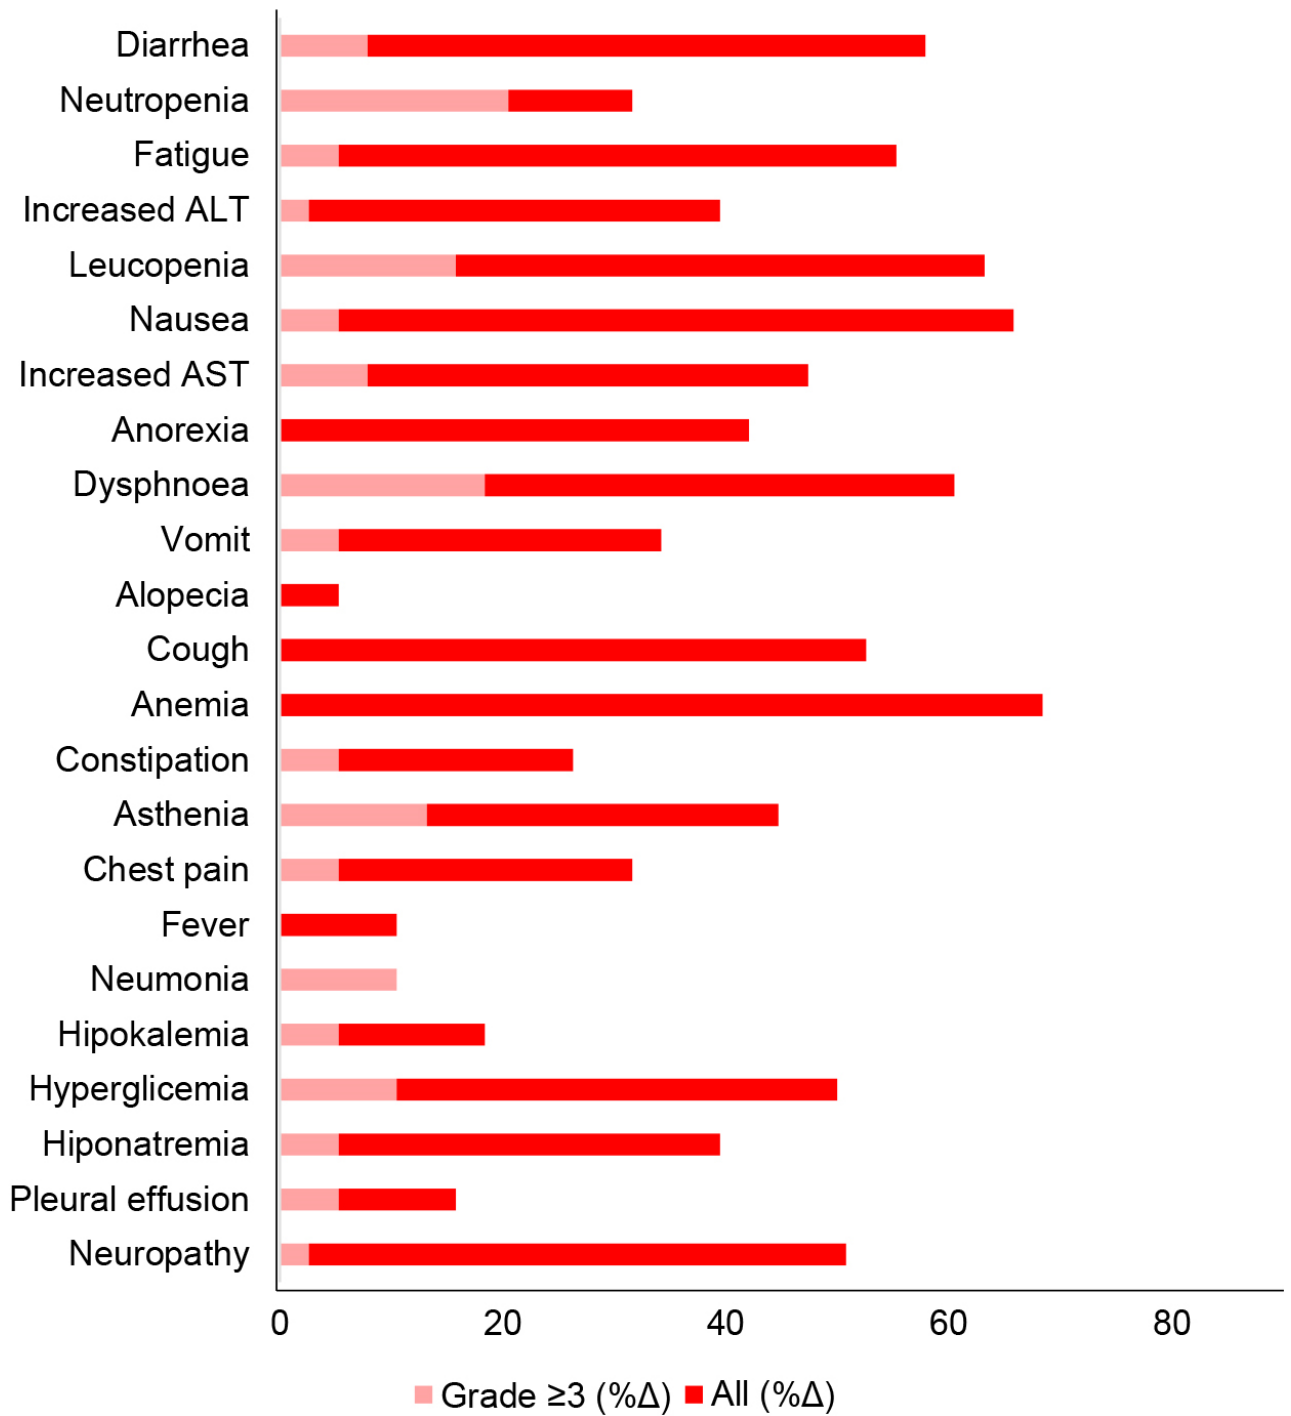

Supplemental Fig. 1

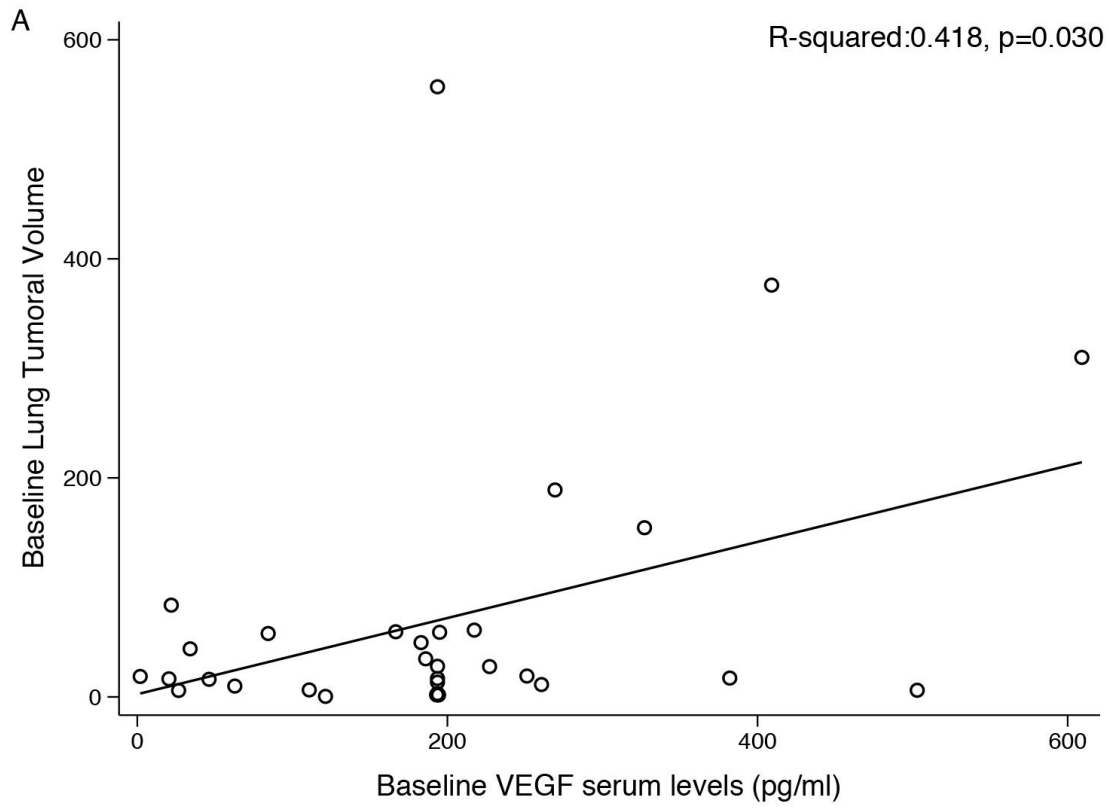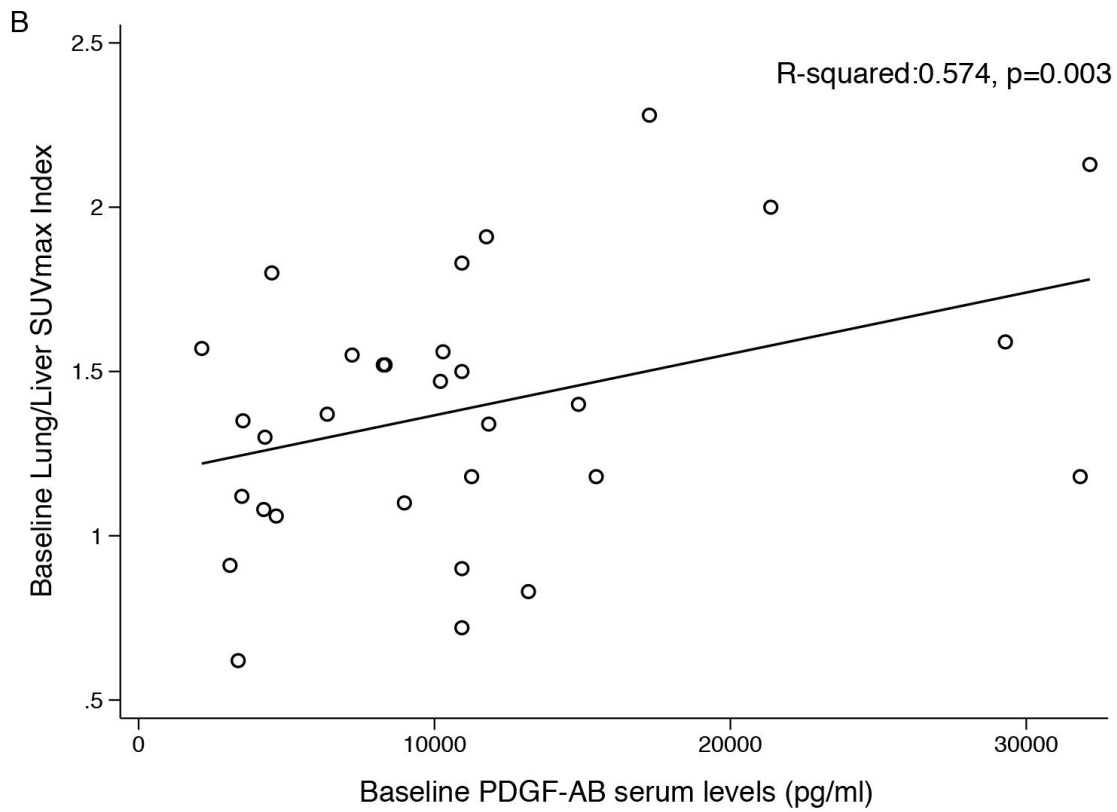

Supplemental Fig. 2. Scatterplots of the significant correlations among baseline PET/CT parameters measured with  $^{68}\text{Ga}$ -DOTA-E-[c(RGDfK)]<sub>2</sub> radiotracer and angiogenic soluble factors.

Supplemental Table 1. General characteristics of patients (N=38)

| Variable                            | % (n/N)              |
|-------------------------------------|----------------------|
| Gender                              |                      |
| Female                              | 65.8 (25/38)         |
| Male                                | 34.2 (13/38)         |
| Age                                 |                      |
| Mean $\pm$ SD                       | 58.7 $\pm$ 11.4      |
| $\leq$ 60 yrs                       | 42.1 (16/38)         |
| $>$ 60 yrs                          | 57.9 (22/38)         |
| Tobacco exposure                    |                      |
| Non-smokers                         | 57.9 (22/38)         |
| Smokers                             | 42.1 (16/38)         |
| Tobacco index                       |                      |
| Median (range)                      | 24 (1-102)           |
| Diabetes Mellitus                   |                      |
| Absent                              | 84.2 (32/38)         |
| Present                             | 15.8 (6/38)          |
| Systemic hypertension               |                      |
| Absent                              | 71.1 (27/38)         |
| Present                             | 28.9 (11/38)         |
| Clinical stage at diagnosis         |                      |
| II-III                              | 18.4 (7/38)          |
| IV                                  | 81.6 (31/38)         |
| Baseline ECOG                       |                      |
| $\leq$ 1                            | 97.4 (37/38)         |
| $\geq$ 2                            | 2.6 (1/38)           |
| Adenocarcinoma histological pattern |                      |
| Lepidic                             | 5.3 (2/38)           |
| Papillary                           | 15.8 (6/38)          |
| Acinar                              | 21.1 (8/38)          |
| Solid                               | 10.5 (4/38)          |
| Other/Not specified                 | 47.4 (18/38)         |
| Carcinoembryonic antigen            |                      |
| Median [Range]                      | 7.3 [0.53 - 1,590.0] |
| Carcinoembryonic antigen            |                      |
| $\leq$ 10 pg/mL                     | 52.6 (20/38)         |
| $>$ 10 pg/mL                        | 47.4 (18/38)         |
| 1st line therapy scheme             |                      |
| Cis/Carbo-platin /Taxane            | 71.1 (27/38)         |
| Cis/Carbo-platin /Pemetrexed        | 23.7 (9/38)          |
| Cis/Carboplatin/ Gemcitabine        | 5.6 (2/38)           |
| 1st line Overall response rate      | 47.3 (18/38)         |
| 1st line Disease control rate       | 73.7 (28/38)         |
| 2nd line therapy scheme             |                      |
| Nintedanib/Docetaxel                | 100 (38/38)          |
| 2nd line Overall response rate      | 7.9 (3/38)           |
| 2nd line Disease control rate       | 47.3 (18/38)         |

Abbreviations= SD: standard deviation; yrs: years; ECOG: Eastern Cooperative Oncology Group of performance status.

Supplemental Table 2. Characteristics of patients according to disease control rate (DCR) to nintedanib assessed by <sup>68</sup>Ga-DOTA-E-[c(RGDfK)]<sup>2</sup> PET/CT

| Variable                               | Disease control rate (CR + PR + SD) |                | <i>P</i> |
|----------------------------------------|-------------------------------------|----------------|----------|
|                                        | No<br>% (n/N)                       | Yes<br>% (n/N) |          |
| Gender                                 |                                     |                |          |
| Female                                 | 50.0 (12/24)                        | 50.0 (12/24)   | 0.715*   |
| Male                                   | 40.0 (4/10)                         | 60.0 (6/10)    |          |
| Age                                    |                                     |                |          |
| ≤ 60 yrs                               | 56.3 (9/16)                         | 43.8 (7/16)    | 0.311    |
| > 60 yrs                               | 38.9 (7/18)                         | 61.1 (11/18)   |          |
| Tobacco exposure                       |                                     |                |          |
| Non-smokers                            | 42.9 (9/21)                         | 57.1 (12/21)   | 0.533    |
| Smokers                                | 53.8 (7/13)                         | 46.2 (6/13)    |          |
| Diabetes Mellitus                      |                                     |                |          |
| Absent                                 | 48.3 (14/29)                        | 51.7 (15/29)   | 1.000*   |
| Present                                | 40.0 (2/5)                          | 60.0 (3/5)     |          |
| Systemic hypertension                  |                                     |                |          |
| Absent                                 | 56.0 (14/25)                        | 44.0 (11/25)   | 0.125*   |
| Present                                | 22.2 (2/9)                          | 77.8 (7/9)     |          |
| Number of metastases                   |                                     |                |          |
| ≤1                                     | 30.0 (3/10)                         | 70.0 (7/10)    | 0.270*   |
| ≥2                                     | 54.2 (13/24)                        | 45.8 (11/24)   |          |
| Histological grade of differentiation† |                                     |                |          |
| Low & Moderate                         | 35.7 (5/9)                          | 64.3 (9/14)    | 0.527    |
| High                                   | 50.0 (2/4)                          | 50.0 (2/4)     |          |
| Not specified                          | 56.3 (9/16)                         | 43.8 (7/16)    |          |
| Carcinoembryonic antigen               |                                     |                |          |
| ≤10 pg/mL                              | 61.1 (11/18)                        | 38.9 (7/18)    | 0.100    |
| >10 pg/mL                              | 31.3 (5/16)                         | 68.8 (11/16)   |          |

Abbreviations= PET/CT: Positron Emission Tomography/Computed Tomography; CR: complete response; PR: partial response; SD: stable disease; yrs: years. p-Value for Chi-Square test and (\*) Fisher's exact test.

Note: †according to adenocarcinoma IASLC/ATS/ERS classification.

Supplemental Table 3. <sup>68</sup>Ga-DOTA-E-[c(RGDfK)]<sup>2</sup> PET/CT parameters (N=30) according to disease control rate

| Variable                       | Disease Control Rate |       |       |              |        |       |      | <i>P</i>     |
|--------------------------------|----------------------|-------|-------|--------------|--------|-------|------|--------------|
|                                | Non-responders       |       |       | Responders   |        |       |      |              |
|                                | Median               | Range |       |              | Median | Range |      |              |
| Lung Tumor SUVmax              |                      |       |       |              |        |       |      |              |
| Baseline                       | 5.5                  | 1.3   | 7     | 0.346        | 4.3    | 2     | 9.2  | 0.363        |
| Follow-Up                      | 4                    | 2.5   | 6.6   |              | 3.5    | 1.8   | 7.8  |              |
| %Δ Lung Tumor SUVmax           |                      | -27.3 |       |              |        | -18.6 |      |              |
| Spleen SUVmax                  |                      |       |       |              |        |       |      |              |
| Baseline                       | 5                    | 1.6   | 6.9   | 0.118        | 5.8    | 4.3   | 8.4  | 0.255        |
| Follow-Up                      | 5.8                  | 2.4   | 8.3   |              | 5.2    | 2.8   | 12.1 |              |
| %Δ Spleen SUVmax               |                      | 16    |       |              |        | -10.3 |      |              |
| Liver SUVmax                   |                      |       |       |              |        |       |      |              |
| Baseline                       | 3.5                  | 1     | 5     | 0.753        | 3.2    | 2.1   | 5.5  | 0.410        |
| Follow-Up                      | 3.3                  | 2     | 5.9   |              | 3.1    | 1.6   | 6.5  |              |
| %Δ Liver SUVmax                |                      | -5.7  |       |              |        | -3.1  |      |              |
| Lung Tumor/Spleen SUVmax Index |                      |       |       |              |        |       |      |              |
| Baseline                       | 1                    | 0.4   | 1.6   | <b>0.008</b> | 0.8    | 0.4   | 1.1  | 0.806        |
| Follow-Up                      | 0.7                  | 0.4   | 1.3   |              | 0.7    | 0.5   | 1.2  |              |
| %Δ Lung/Spleen Index           |                      | -30   |       |              |        | -13   |      |              |
| LungTumor/Liver SUVmax Index   |                      |       |       |              |        |       |      |              |
| Baseline                       | 1.5                  | 0.8   | 2.3   | 0.074        | 1.2    | 0.6   | 2.1  | 0.629        |
| Follow-Up                      | 1.2                  | 0.8   | 2.8   |              | 1.3    | 0.7   | 1.9  |              |
| %Δ Lung/Liver SUVmax Index     |                      | -18   |       |              |        | 6.8   |      |              |
| Lung Tumoral Volume            |                      |       |       |              |        |       |      |              |
| Baseline                       | 49.6                 | 0.5   | 557.1 | 0.088        | 17.2   | 1.8   | 189  | <b>0.005</b> |
| Follow-Up                      | 35.9                 | 0.3   | 634.4 |              | 10.8   | 0     | 180  |              |
| %Δ Lung Tumoral Volume         |                      | -27.6 |       |              |        | -37.2 |      |              |

Abbreviations= PET/CT: Positron Emission Tomography/Computed Tomography; %Δ: percentage of change; SUV: Standardized Unit Values.

Supplemental Table 4. Association of <sup>68</sup>Ga-DOTA-E-[c(RGDfK)]<sub>2</sub> PET/CT parameters with baseline and %Δ angiogenic soluble factors

| Variable                                | Baseline FGF   |       | Baseline VEGF  |              | Baseline PDGF-AB |              |
|-----------------------------------------|----------------|-------|----------------|--------------|------------------|--------------|
|                                         | r <sup>2</sup> | P     | r <sup>2</sup> | P            | r <sup>2</sup>   | P            |
| PET/CT parameter                        |                |       |                |              |                  |              |
| Baseline Lung Tumor SUVmax              | -0.219         | 0.316 | 0.078          | 0.719        | 0.339            | 0.083        |
| Baseline Spleen SUVmax                  | -0.062         | 0.779 | -0.080         | 0.710        | 0.130            | 0.520        |
| Baseline Liver SUVmax                   | -0.110         | 0.617 | 0.056          | 0.793        | 0.128            | 0.526        |
| Baseline Lung Tumor/Spleen SUVmax Index | -0.208         | 0.340 | 0.167          | 0.435        | 0.332            | 0.091        |
| Baseline Lung Tumor/Liver SUVmax Index  | -0.173         | 0.430 | 0.041          | 0.848        | 0.418            | <b>0.030</b> |
| Baseline Lung Tumoral Volume            | 0.113          | 0.607 | 0.574          | <b>0.003</b> | -0.310           | 0.116        |

Abbreviations= SUV: Standardized Unit Values; PET/CT: Positron Emission Tomography/Computed Tomography; %Δ: percentage of change; FGF: Fibroblast growth factor; VEGF: Vascular endothelial growth factor; PDGF-AB: Platelet derived growth factor-AB; r<sup>2</sup>: root-squared.

Supplemental Table 5. Univariate analysis of clinical and <sup>68</sup>Ga-DOTA-E-[c(RGDfK)]<sub>2</sub> PET/CT factors associated with Progression-free Survival and Overall Survival

| Variable                    | Progression-free Survival |                |              | Overall Survival |              |               |
|-----------------------------|---------------------------|----------------|--------------|------------------|--------------|---------------|
|                             | Median                    | 95% CI         | <i>P</i>     | Median           | 95% CI       | <i>P</i>      |
| Overall                     | 3.7                       | [2.04 - 5.38]  |              | NR               | NR           |               |
| Gender                      |                           |                |              |                  |              |               |
| Female                      | 3.7                       | [1.01 - 6.34]  | 0.666        | NR               | NR           | 0.726         |
| Male                        | 5.6                       | [2.24 - 8.98]  |              | NR               | NR           |               |
| Age                         |                           |                |              |                  |              |               |
| <60 yrs                     | 3.4                       | [1.84 - 4.92]  | 0.307        | NR               | NR           | 0.265         |
| >60 yrs                     | 5.6                       | [2.43 - 8.79]  |              | NR               | NR           |               |
| Tobacco exposure            |                           |                |              |                  |              |               |
| Non-smokers                 | 3.7                       | [1.16 - 6.19]  | 0.414        | NR               | NR           | <b>0.038*</b> |
| Smokers                     | 5.3                       | [0.64 - 6.77]  |              | NR               | NR           |               |
| Diabetes Mellitus           |                           |                |              |                  |              |               |
| Absent                      | 3.7                       | [2.18 - 5.17]  | 0.555        | NR               | NR           | 0.985         |
| Present                     | 5.3                       | [0.00 - 13.59] |              | NR               | NR           |               |
| Systemic hypertension       |                           |                |              |                  |              |               |
| Absent                      | 3.4                       | [1.73 - 5.03]  | <b>0.023</b> | NR               | NR           | 0.118         |
| Present                     | 6.4                       | [5.54 - 7.20]  |              | NR               | NR           |               |
| Clinical stage at diagnosis |                           |                |              |                  |              |               |
| II-III                      | 3.4                       | [0.00 - 7.34]  | 0.412        | NR               | NR           | 0.734         |
| IV                          | 3.7                       | [1.37 - 6.04]  |              | NR               | NR           |               |
| Baseline ECOG               |                           |                |              |                  |              |               |
| ≤1                          | 3.7                       | [2.05 - 5.30]  | 0.431        | NR               | NR           | 0.488         |
| ≥2                          | NR                        | [NR]           |              | NR               | NR           |               |
| Carcinoembryonic antigen    |                           |                |              |                  |              |               |
| ≤10 pg/mL                   | 3.7                       | [1.98-5.37]    | 0.629        | NR               | NR           | 0.972         |
| >10 pg/mL                   | 5.6                       | [2.29 - 8.94]  |              | NR               | NR           |               |
| Baseline Lung Tumor SUVmax  |                           |                |              |                  |              |               |
| <4.3                        | 4.7                       | [0.09 - 9.37]  | 0.600        | 7.1              | NR           | 0.170         |
| ≥4.3                        | 3.7                       | [3.15 - 4.20]  |              | NR               | NR           |               |
| %Δ Lung Tumor SUVmax        |                           |                |              |                  |              |               |
| < - 18.6                    | 2.0                       | [1.46 - 2.61]  | 0.120*       | 7.1              | [0.0 - 14.7] | <b>0.016</b>  |
| ≥ - 18.6                    | 3.7                       | [2.24 - 5.17]  |              | NR               | NR           |               |
| Baseline Spleen SUVmax      |                           |                |              |                  |              |               |
| <5                          | 4.7                       | [2.30 - 7.15]  | 0.618        | NR               | NR           | 0.888         |
| ≥5                          | 3.6                       | [2.25 - 4.90]  |              | NR               | NR           |               |
| %Δ Spleen SUVmax            |                           |                |              |                  |              |               |
| < 16.0                      | 4.7                       | [0.73 - 8.72]  | 0.790        | NR               | NR           | 0.603         |
| ≥ 16.0                      | 3.6                       | [2.39 - 4.77]  |              | NR               | NR           |               |
| Baseline Liver SUVmax       |                           |                |              |                  |              |               |
| <3.2                        | 4.7                       | [0.44 - 9.01]  | 0.673        | NR               | NR           | 0.697         |
| ≥3.2                        | 3.7                       | [2.11 - 5.24]  |              | NR               | NR           |               |
| %Δ Liver SUVmax             |                           |                | 0.858*       |                  |              | 0.069*        |

|                                         |     |                |              |     |             |              |
|-----------------------------------------|-----|----------------|--------------|-----|-------------|--------------|
| < 3.5                                   | 4.7 | [0.69-8.77]    |              | NR  | NR          |              |
| ≥ 3.5                                   | 3.6 | [2.27 - 4.88]  |              | NR  | NR          |              |
| Baseline Lung Tumor/Spleen SUVmax Index |     |                |              |     |             |              |
| <0.8                                    | 2.8 | [0.87 - 4.71]  | 0.460        | 4.6 | [1.4 - 7.7] | 0.022        |
| ≥0.8                                    | 3.7 | [1.37 - 6.04]  |              | NR  | NR          |              |
| %Δ Lung Tumor/Spleen SUVmax Index       |     |                |              |     |             |              |
| < - 12.5                                | 2.8 | [0.33 - 5.24]  | 0.409*       | 7.8 | [5.9 - 9.8] | <b>0.043</b> |
| ≥ -12.5                                 | 4.7 | [2.52 - 6.93]  |              | NR  | NR          |              |
| Baseline Lung Tumor/Liver SUVmax Index  |     |                |              |     |             |              |
| <1.4                                    | 2.3 | [0.00 - 5.34]  | 0.464*       | NR  | NR          | 0.486        |
| ≥1.4                                    | 3.7 | [3.12 - 4.30]  |              | NR  | NR          |              |
| %Δ Lung Tumor/Liver SUVmax Index        |     |                |              |     |             |              |
| < -14.2                                 | 3.7 | [1.77 - 5.58]  | 0.308        | NR  | NR          | 0.343        |
| ≥ -14.2                                 | 3.7 | [1.55 - 5.87]  |              | NR  | NR          |              |
| Baseline Lung Tumoral Volume            |     |                |              |     |             |              |
| <19.1                                   | 2.1 | [1.66 - 2.61]  | <b>0.007</b> | NR  | NR          | 0.459        |
| ≥19.1                                   | 6.4 | [2.12 - 10.62] |              | NR  | NR          |              |
| %Δ Lung Tumoral Volume                  |     |                |              |     |             |              |
| < -37.7                                 | 3.7 | [2.32 - 5.03]  | 0.365        | NR  | NR          | 0.378        |
| ≥ -37.7                                 | 2.8 | [0.67 - 4.91]  |              | NR  | NR          |              |

Abbreviations: CI: Confidence interval; yrs:years, ECOG PS: European Clinical Oncological Group performance status; SUV: Standardized Unit Values; %Δ: percentage of change. Notes (\*) Breslow test.



Supplemental Table 6. Multivariate analysis of clinical and <sup>68</sup>Ga-DOTA-E-[c(RGDfK)]<sup>2</sup> PET/CT factors associated with Progression-free Survival and Overall Survival

| Variable                     | Progression-free Survival |              | Overall Survival  |              |
|------------------------------|---------------------------|--------------|-------------------|--------------|
|                              | HR (95% CI)               | <i>P</i>     | HR (95% CI)       | <i>P</i>     |
| Gender                       |                           |              | 0.9 (0.27 - 3.53) | 0.979        |
| Age                          |                           |              | 1.4 (0.55 - 3.67) | 0.455        |
| Tobacco exposure             |                           |              | 2.3 (0.68 - 7.95) | 0.176        |
| Systemic hypertension        | 0.2 (0.07 - 0.80)         | <b>0.021</b> |                   |              |
| %Δ Lung Tumor SUVmax         |                           |              | 3.1 (1.0 - 9.8)   | <b>0.048</b> |
| Baseline Spleen SUVmax       | 0.4 (0.14 - 1.09)         | 0.074        |                   |              |
| Baseline Lung Tumoral Volume | 0.4 (0.17 - 1.08)         | 0.075        |                   |              |

Abbreviations= PET/CT: Positron Emission Tomography/Computed Tomography; CI: Confidence Interval; %Δ: percentage of change; SUV: Standardized Unit Values.
